# Supplementary material for: Modification of Gene Expression, Proliferation, and Function of OP9 Stroma Cells by Bcr-Abl-Expressing Leukemia Cells
Source: PubMed Central journal article supplement (PMC4517910; doi:10.1371/journal.pone.0134026), 2015-07-28
Supplement: pone.0134026.s008.pdf [file pone.0134026.s008.pdf]

**Table S1. Altered gene expression in OP9 cells by the coculture with KOBA cells**

| Genes overexpressed in OP9/L cells |              |  |          |              |          |              |
|------------------------------------|--------------|--|----------|--------------|----------|--------------|
| Genes                              | Ratio (log2) |  | Genes    | Ratio (log2) | Genes    | Ratio (log2) |
| Fosb                               | 6.20         |  | Bhlhe40  | 2.40         | Ntrk3    | 1.72         |
| Ubd                                | 5.73         |  | Junb     | 2.40         | Btg1     | 1.72         |
| Fos                                | 5.63         |  | Sym      | 2.38         | Cx3cl1   | 1.71         |
| Cd74                               | 5.31         |  | Tgtp2    | 2.36         | Cxcr7    | 1.71         |
| C3                                 | 5.24         |  | Icam1    | 2.36         | H2-T23   | 1.71         |
| Gdpd2                              | 5.20         |  | Ier3     | 2.29         | Map3k8   | 1.70         |
| Ccl5                               | 5.16         |  | Sphk1    | 2.26         | H2-Q2    | 1.70         |
| Cxcl1                              | 5.06         |  | Tifa     | 2.22         | Enpp3    | 1.69         |
| Zfp36                              | 5.00         |  | Socs3    | 2.21         | C1ra     | 1.69         |
| Mmp13                              | 4.94         |  | Apoe     | 2.16         | Cnm4     | 1.67         |
| Cfb                                | 4.94         |  | Arid5a   | 2.08         | Irf1     | 1.67         |
| Lcn2                               | 4.71         |  | Egr4     | 2.08         | H2-M2    | 1.66         |
| Ccl2                               | 4.54         |  | Nrg1     | 2.08         | P2rx4    | 1.66         |
| Nrp2                               | 4.30         |  | Cp       | 2.08         | Pcdhb7   | 1.65         |
| C4b                                | 4.22         |  | Malat1   | 2.08         | Speer4b  | 1.65         |
| Serpina3g                          | 4.13         |  | Bmper    | 2.05         | H2-D1    | 1.64         |
| Mt1                                | 3.97         |  | Tnxb     | 2.04         | Dclk1    | 1.64         |
| Enpp2                              | 3.83         |  | Postn    | 2.00         | Adamts9  | 1.63         |
| Chadl                              | 3.62         |  | Pim1     | 2.00         | Ankrd37  | 1.63         |
| Crip1                              | 3.61         |  | Nat8     | 1.99         | Adamts9  | 1.63         |
| Jun                                | 3.44         |  | Ppp1r15a | 1.99         | Slit2    | 1.61         |
| Mt2                                | 3.44         |  | Eno2     | 1.97         | Zc3h12a  | 1.61         |
| Atf3                               | 3.36         |  | Pip5k1a  | 1.97         | Ptgir    | 1.61         |
| Zmynd15                            | 3.34         |  | Tnfsf11  | 1.97         | Ank3     | 1.60         |
| Knk1                               | 3.21         |  | Slco1a5  | 1.95         | Ly6e     | 1.59         |
| H2-K1                              | 3.15         |  | Ninl     | 1.93         | Car15    | 1.59         |
| Lrg1                               | 3.10         |  | Nr4a1    | 1.91         | Hist1h1c | 1.59         |
| Nfkbiz                             | 3.09         |  | Socs1    | 1.90         | Rarres2  | 1.59         |
| Ier2                               | 3.02         |  | Sparcl1  | 1.88         | Bcl3     | 1.58         |
| Ramp2                              | 3.01         |  | Tgm2     | 1.88         | Slc12a5  | 1.57         |
| Cxcl5                              | 2.86         |  | H2-K2    | 1.86         | Plod2    | 1.57         |
| Tlr2                               | 2.85         |  | H2-B1    | 1.85         | Med12    | 1.57         |
| Chrdl1                             | 2.85         |  | Spns2    | 1.84         | Rgs11    | 1.57         |
| Ak4                                | 2.83         |  | Slc23a3  | 1.84         | Ism1     | 1.56         |
| Ccl7                               | 2.78         |  | Igsf3    | 1.83         | Arrdc4   | 1.55         |
| Sfrp4                              | 2.72         |  | Agt      | 1.82         | Lifr     | 1.55         |
| Ptgs2                              | 2.72         |  | Col3a1   | 1.79         | Hes1     | 1.55         |
| Apod                               | 2.71         |  | Gpr146   | 1.79         | Dpysl3   | 1.54         |
| Dnahc6                             | 2.71         |  | Dusp1    | 1.78         | Gcm1     | 1.54         |
| Vpreb1                             | 2.66         |  | Nfkbia   | 1.78         | Cygb     | 1.52         |
| Apln                               | 2.63         |  | Cfh      | 1.78         | Ablim1   | 1.52         |
| Dtx4                               | 2.61         |  | Ltbp2    | 1.77         | Fgd6     | 1.51         |
| Sfrp2                              | 2.60         |  | Kif21b   | 1.77         | Il6      | 1.47         |
| Nfkbie                             | 2.53         |  | Ninl     | 1.77         | Col20a1  | 1.34         |
| Gfra4                              | 2.53         |  | H2-Q7    | 1.76         | Cdh11    | 1.27         |
| Btg2                               | 2.50         |  | C1rb     | 1.75         | Pdgfra   | 1.22         |
| C1s                                | 2.49         |  | Egr2     | 1.74         | Cdh26    | 1.05         |
| Tgfb1                              | 2.43         |  | Cxadr    | 1.73         | Vegfa    | 0.66         |
| Frat2                              | 2.40         |  | H2-Q6    | 1.73         |          |              |
| Esm1                               | 2.40         |  | Scara5   | 1.72         |          |              |

Genes underexpressed in OP9/L cells

| Genes   | Ratio (log2) | Genes   | Ratio (log2) | Genes    | Ratio (log2) |
|---------|--------------|---------|--------------|----------|--------------|
| Cdkn2b  | -0.96        | Eif2s3y | -1.72        | Cdkn1c   | -2.18        |
| Cdkn1a  | -1.06        | Ddx3y   | -1.73        | Cryab    | -2.18        |
| Cdkn1b  | -1.16        | Svop    | -1.73        | Cd109    | -2.18        |
| Cdkn3   | -1.30        | Sorbs2  | -1.73        | Mgp      | -2.19        |
| Pde1b   | -1.50        | Slitrk5 | -1.77        | Gcnt1    | -2.22        |
| Cd44    | -1.50        | S100a4  | -1.77        | Tbc1d2   | -2.22        |
| Tram111 | -1.51        | Dlk1    | -1.78        | Mfap5    | -2.23        |
| Filip1l | -1.52        | Tes     | -1.78        | Cd24a    | -2.28        |
| Lmcd1   | -1.52        | H19     | -1.83        | Chac1    | -2.30        |
| Gale    | -1.52        | Scx     | -1.84        | Klhdc9   | -2.36        |
| Hspb1   | -1.53        | Itgad   | -1.86        | Bcat1    | -2.41        |
| Cd97    | -1.53        | Myom1   | -1.86        | Anxa8    | -2.43        |
| Ass1    | -1.56        | Fgd3    | -1.88        | Inhba    | -2.53        |
| Rassf7  | -1.56        | Sncg    | -1.92        | Pdlim5   | -2.68        |
| Hps1    | -1.60        | Scrn1   | -1.95        | Prl2c5   | -2.93        |
| Atp9a   | -1.60        | Lgr5    | -1.97        | Siglecg  | -2.99        |
| Rem1    | -1.60        | Lbh     | -1.99        | Ifi27l2a | -3.00        |
| Sdr39u1 | -1.62        | Des     | -2.00        | Prl2c5   | -3.01        |
| Smarca1 | -1.62        | Npas4   | -2.03        | Plb1     | -3.52        |
| Dysf    | -1.63        | Cryab   | -2.04        | Syt10    | -3.62        |
| Trim16  | -1.63        | Aif1l   | -2.05        | Aldh1a7  | -3.84        |
| Mogat2  | -1.64        | S100b   | -2.08        | Tmem184a | -4.40        |
| Ndr4    | -1.65        | Mcf2l   | -2.10        |          |              |
| Col18a1 | -1.66        | Cnn1    | -2.11        |          |              |
| Idi1    | -1.68        | Mirg    | -2.14        |          |              |
| Comp    | -1.70        | Sykb    | -2.17        |          |              |
