# Supplementary material for: Modification of Gene Expression, Proliferation, and Function of OP9 Stroma Cells by Bcr-Abl-Expressing Leukemia Cells
Source: PubMed Central journal article supplement (PMC4517910; doi:10.1371/journal.pone.0134026), 2015-07-28
Supplement: pone.0134026.s009.pdf [file pone.0134026.s009.pdf]

| <b>Table S2. List of the primer pairs</b> |                          |                          |
|-------------------------------------------|--------------------------|--------------------------|
| <b>Genes</b>                              | <b>sense</b>             | <b>anti-sense</b>        |
| <i>Ccl2</i>                               | catccacgtgttggtca        | gatcatcttgctggtgaatgagt  |
| <i>Ccl5</i>                               | tgagaggactctgagacagc     | gagtgggtgccgagccata      |
| <i>Ccl7</i>                               | ttctgtcctgctgctcata      | ttgacatagcagcatgtggat    |
| <i>Cxcl1</i>                              | gactccagccacactccaac     | tgacagcgcagctcattg       |
| <i>Cxcl5</i>                              | tagagccccaatccacac       | gagctggaggctcattgtg      |
| <i>C3</i>                                 | accttacctcggcaagtttct    | ttgtagagctgctggtcagg     |
| <i>C4</i>                                 | tctcacaaccctcgacat       | agcatcctggaacacctgaa     |
| <i>Spp1</i>                               | cccgggtgaaagtgactgatt    | ttcttcagaggacacagcattc   |
| <i>Icam1</i>                              | cccacgctacctctgctc       | gatggatacctgagcatcacc    |
| <i>CD44</i>                               | ctccttctttatccggagcac    | tggcttttgagtgcacagt      |
| <i>Itga3</i>                              | tcaacatggagaacaagacca    | ccaaccacagctcaatctc      |
| <i>Itgb3</i>                              | gtgggagggcagtcctcta      | caggatatcaggacccttg      |
| <i>Cdh13</i>                              | cactcaccaaaattcaccaaga   | ttgacaatgacccccacag      |
| <i>Scf</i>                                | tcaacattaggtcccagagaaa   | actgctactgctgtcattcctaag |
| <i>Cxcl12</i>                             | ccaaactgtgcccttcaga      | atttcgggtcaatgcacact     |
| <i>Angp1</i>                              | ggaagatggaagcctggat-     | accagagggattcccaaac      |
| <i>Cdkn1a</i>                             | tccacagcgatatccagaca     | ggacatcaccaggattggac     |
| <i>Cdkn1b</i>                             | gtagcggagcagtgcca        | tctgttctgtggcccttt       |
| <i>Cdkn1c</i>                             | caggacgagaatcaagagca     | gcttggcgaagaagtcgt       |
| <i>Cdkn3</i>                              | gatgaagaacagactccaattcaa | aacctggaagagcacataaacc   |
| <i>Hey1</i>                               | catgaagagagctcaccaga     | cgccgaactcaagttcc        |
| <i>Hey2</i>                               | gtggggagcggagaacaatta    | gttgcggtgaattggacct      |
| <i>Hes1</i>                               | tgccagctgatataatggagaa   | ccatgataggctttgatgacttt  |
